# Supplementary material
Source: Springer Nature journal article supplement (https://www.springermedizin.de/resource/supplementary/12883_2010_408_MOESM3_ESM.pdf/9455276)

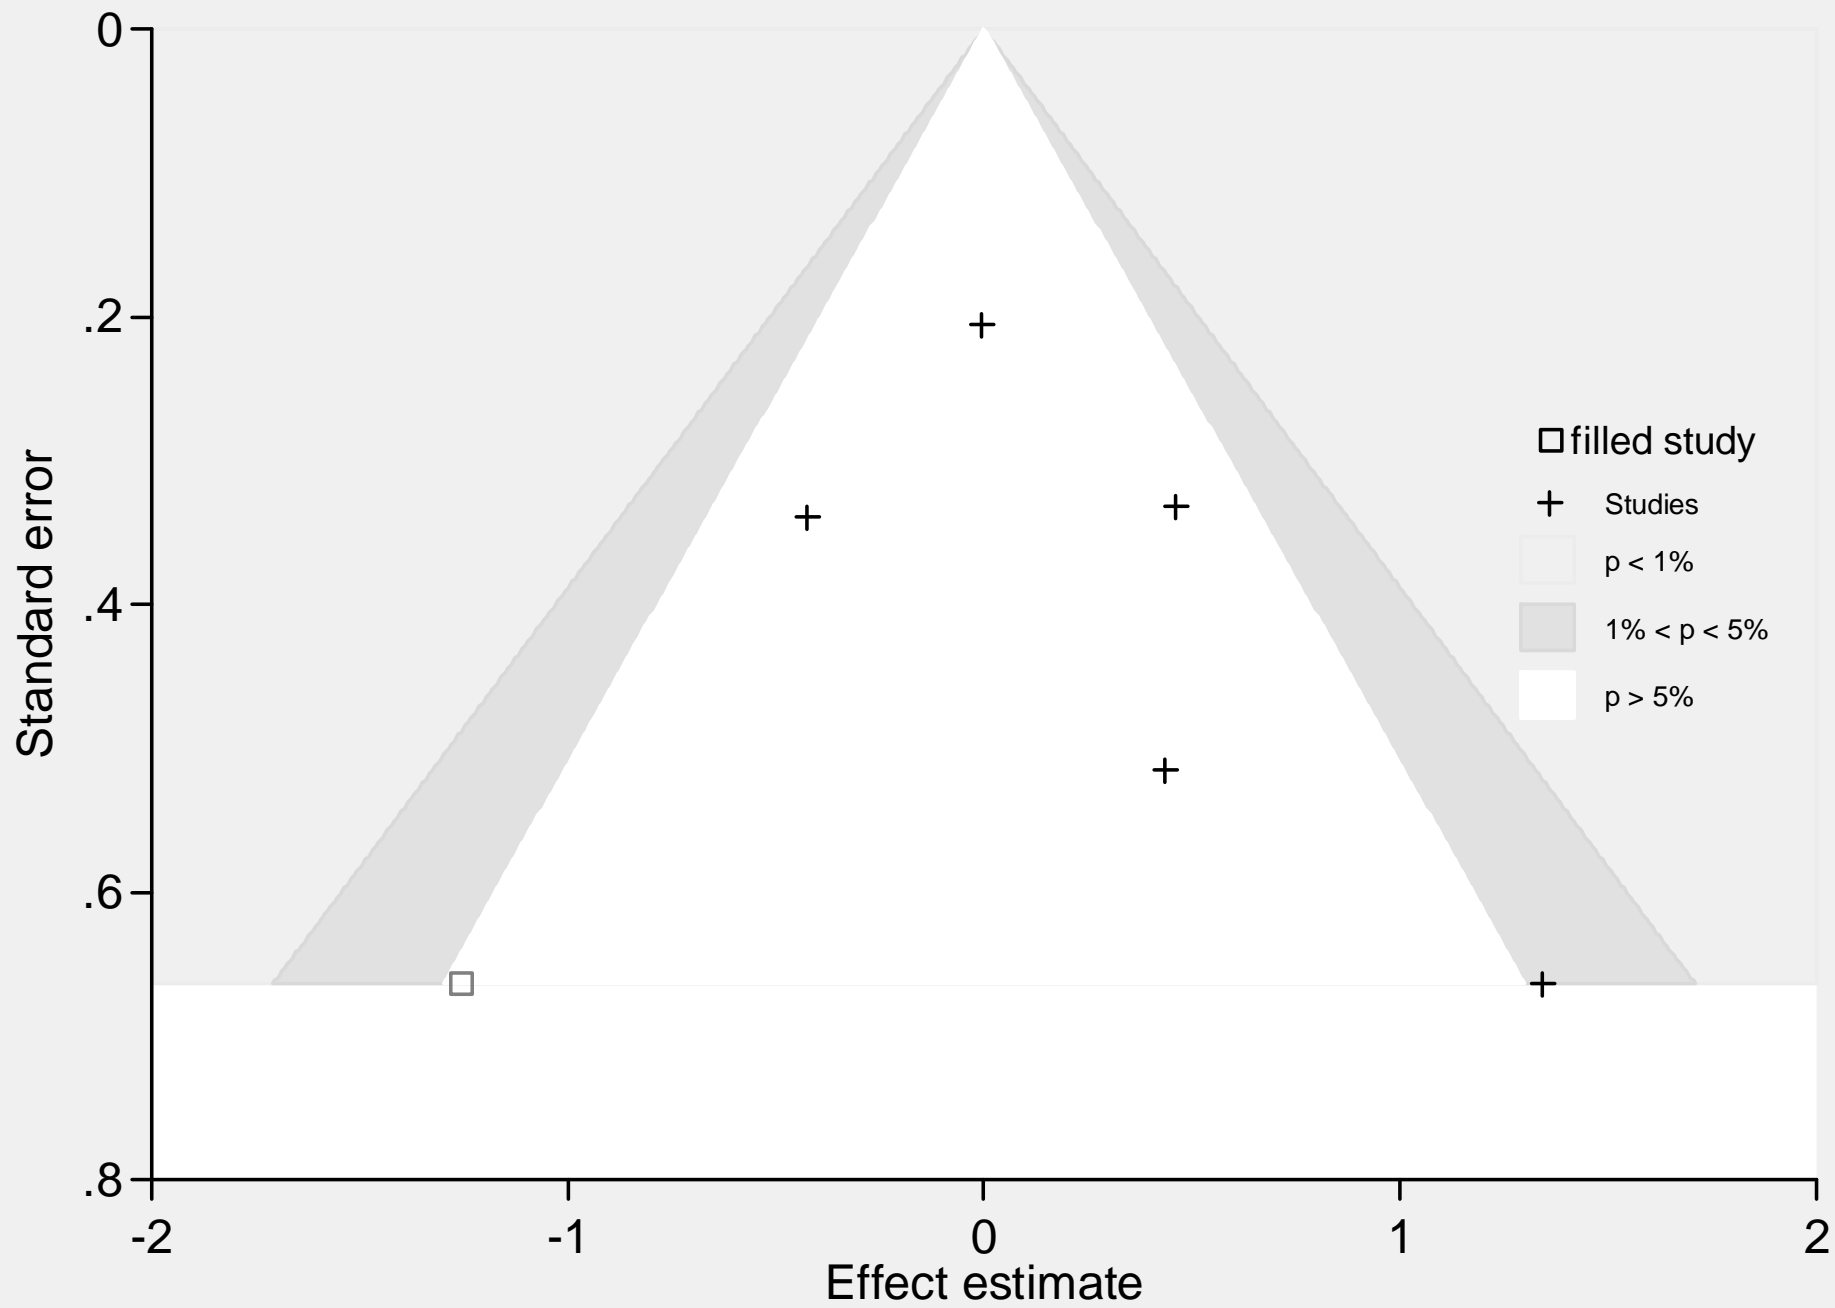

Supplement: MOESM3 [file 9455276]
